# Supplementary material for: An amphioxus orthologue of the estrogen receptor that does not bind estradiol: Insights into estrogen receptor evolution
Source: PubMed Central journal article supplement (PMC2529310; doi:10.1186/1471-2148-8-219), 2008-07-25
Supplement: 1471-2148-8-219-S2.pdf [file 1471-2148-8-219-S2.pdf]

human ER $\alpha$

human ER $\beta$

mouse ERR $\alpha$

amphioxus ER

lamprey ER

|            |   |   |     |    |     |   |     |    |     |   |     |    |     |   |     |    |     |   |     |    |     |
|------------|---|---|-----|----|-----|---|-----|----|-----|---|-----|----|-----|---|-----|----|-----|---|-----|----|-----|
| <b>ERE</b> | - | - | -   | 10 | 100 | - | -   | 10 | 100 | - | -   | 10 | 100 | - | -   | 10 | 100 | - | -   | 10 | 100 |
| <b>NS</b>  | - | - | 100 | -  | -   | - | 100 | -  | -   | - | 100 | -  | -   | - | 100 | -  | -   | - | 100 | -  | -   |

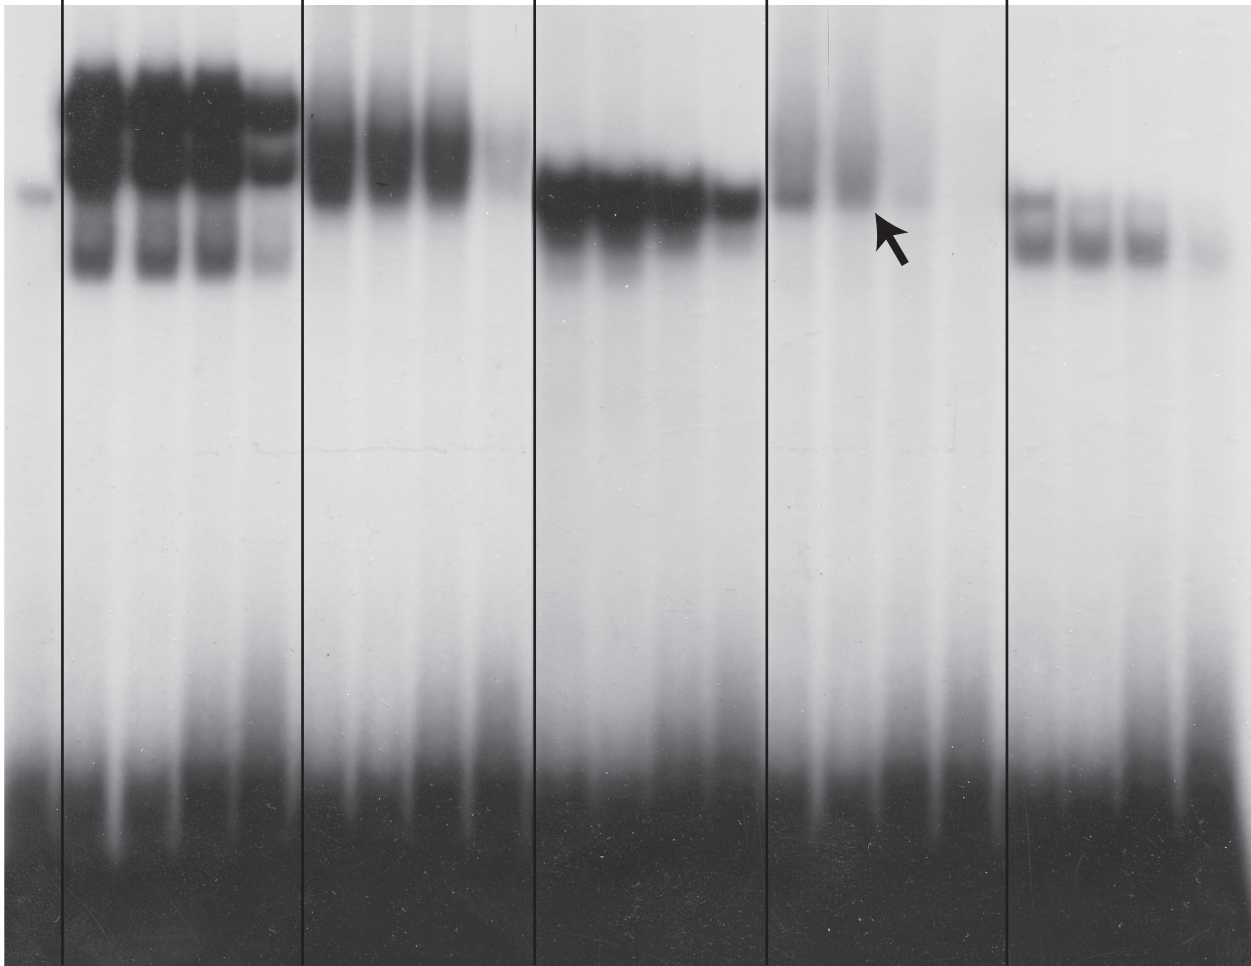

1 2 3 4 5 6 7 8 9 10 11 12 13 14 15 16 17 18 19 20 21

\*
