# Supplementary material for: An amphioxus orthologue of the estrogen receptor that does not bind estradiol: Insights into estrogen receptor evolution
Source: PubMed Central journal article supplement (PMC2529310; doi:10.1186/1471-2148-8-219), 2008-07-25

A

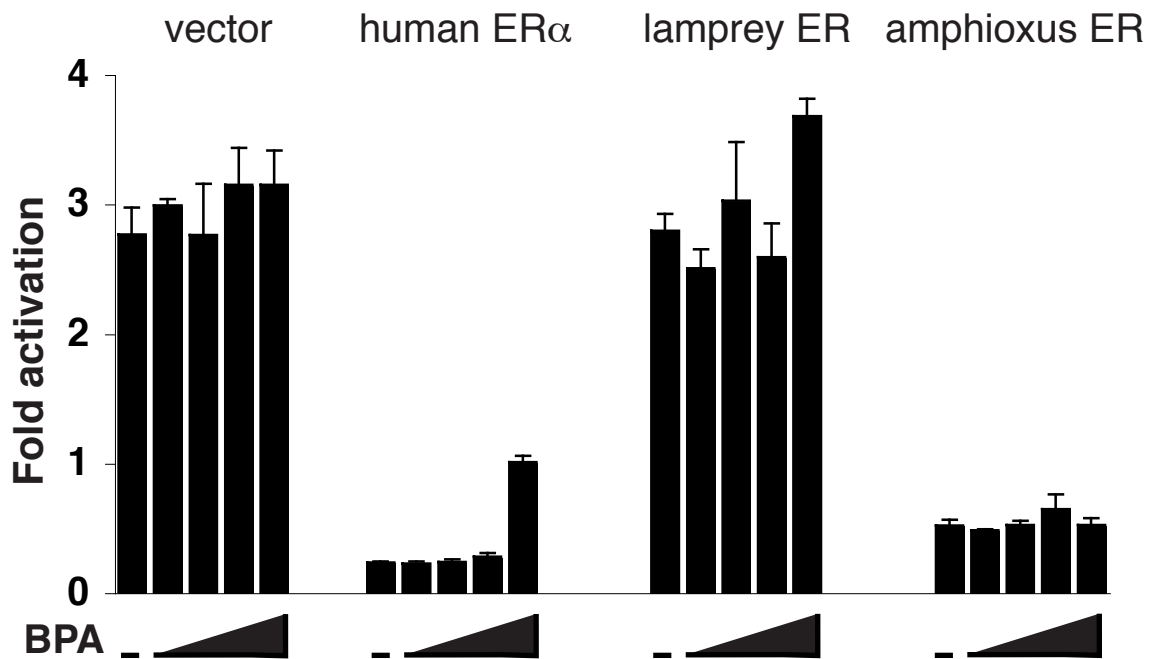

B

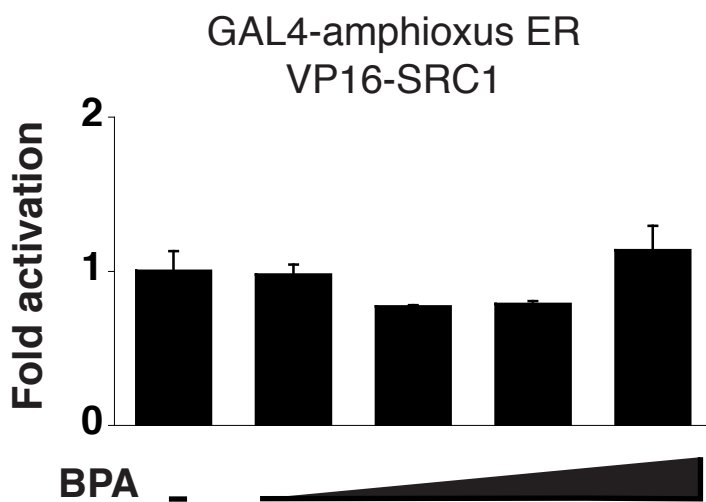

Supplement: 1471-2148-8-219-S4.pdf [file 1471-2148-8-219-S4.pdf]
