# Supplementary material for: An amphioxus orthologue of the estrogen receptor that does not bind estradiol: Insights into estrogen receptor evolution
Source: PubMed Central journal article supplement (PMC2529310; doi:10.1186/1471-2148-8-219), 2008-07-25
Supplement: 1471-2148-8-219-S8.pdf [file 1471-2148-8-219-S8.pdf]

| <b>Accession number</b> | <b>Receptor name</b> | <b>Species name</b>             |
|-------------------------|----------------------|---------------------------------|
| AAA51729                | AR                   | <i>Homo sapiens</i>             |
| NP_001076592            | AR                   | <i>Danio rerio</i>              |
| ABD46746                | AR                   | <i>Leucoraja erinacea</i>       |
| AAP55843                | AR                   | <i>Squalus acanthias</i>        |
| NP_001035179            | AR                   | <i>Gallus gallus</i>            |
| NP_001084353            | ARa                  | <i>Xenopus laevis</i>           |
| BAA75464                | ARa                  | <i>Anguilla japonica</i>        |
| BAA83805                | ARb                  | <i>Anguilla japonica</i>        |
| ABD46742                | CR                   | <i>Myxine glutinosa</i>         |
| AAK20930                | CR                   | <i>Petromyzon marinus</i>       |
| ACF16007                | ER                   | <i>Branchiostoma floridae</i>   |
| BAF45381                | ER                   | <i>Crassostrea gigas</i>        |
| ABQ96884                | ER                   | <i>Nucella lapillus</i>         |
| ABI97119                | ER                   | <i>Marisa cornuarietis</i>      |
| ABG00286                | ER                   | <i>Octopus vulgaris</i>         |
| AAK20929                | ER                   | <i>Petromyzon marinus</i>       |
| AAQ95045                | ER                   | <i>Aplysia californica</i>      |
| BAC66480                | ER                   | <i>Thais clavigera</i>          |
| NP_990514               | ERa                  | <i>Gallus gallus</i>            |
| CAB51479                | ERa                  | <i>Sparus aurata</i>            |
| CAA27284                | ERa                  | <i>Homo sapiens</i>             |
| AAQ25396                | ERa                  | <i>Salmo salar</i>              |
| NP_001083084            | ERa2                 | <i>Xenopus laevis</i>           |
| BAB16893                | ERa1                 | <i>Danio rerio</i>              |
| NP_990125               | ERb                  | <i>Gallus gallus</i>            |
| AAD31033                | ERb                  | <i>Sparus aurata</i>            |
| BAA24953                | ERb                  | <i>Homo sapiens</i>             |
| XP_001511889            | ERb                  | <i>Ornithorhynchus anatinus</i> |
| AAK57823                | ERb                  | <i>Squalus acanthias</i>        |
| AAR92486                | ERb                  | <i>Salmo salar</i>              |
| CAC93848                | ERb1                 | <i>Danio rerio</i>              |
| CAC93849                | ERb2                 | <i>Danio rerio</i>              |
| XP_001663736            | ERR                  | <i>Aedes aegypti</i>            |
| AAU88062                | ERR                  | <i>Branchiostoma floridae</i>   |
| ABI97120                | ERR                  | <i>Marisa cornuarietis</i>      |
| NP_001071700            | ERR                  | <i>Ciona intestinalis</i>       |
| XP_392385               | ERR                  | <i>Apis mellifera</i>           |
| AAF50473                | ERR                  | <i>Drosophila melanogaster</i>  |
| XP_001604033            | ERR                  | <i>Nasonia vitripennis</i>      |
| CAA35778                | ERRa                 | <i>Homo sapiens</i>             |
| NP_998120               | ERRa                 | <i>Danio rerio</i>              |
| AAC99409                | ERRb                 | <i>Homo sapiens</i>             |
| AAS66635                | ERRb                 | <i>Danio rerio</i>              |
| XP_690815               | ERRd                 | <i>Danio rerio</i>              |
| AAC39899                | ERRg                 | <i>Homo sapiens</i>             |
| NP_998119               | ERRg                 | <i>Danio rerio</i>              |
| XP_001354210            | ERR                  | <i>Drosophila pseudoobscura</i> |

|              |                       |                                                                                                                                                                                                   |
|--------------|-----------------------|---------------------------------------------------------------------------------------------------------------------------------------------------------------------------------------------------|
| P49844       | GR                    | <i>Xenopus laevis</i>                                                                                                                                                                             |
| XP_001510749 | GR                    | <i>Ornithorhynchus anatinus</i>                                                                                                                                                                   |
| CAA26976     | GR                    | <i>Homo sapiens</i>                                                                                                                                                                               |
| ABS00394     | GR                    | <i>Danio rerio</i>                                                                                                                                                                                |
| ABF30967     | GR                    | <i>Sparus aurata</i>                                                                                                                                                                              |
| NP_001032915 | GR                    | <i>Gallus gallus</i>                                                                                                                                                                              |
| Q91573       | MR                    | <i>Xenopus laevis</i>                                                                                                                                                                             |
| AAA59571     | MR                    | <i>Homo sapiens</i>                                                                                                                                                                               |
| NP_001093873 | MR                    | <i>Danio rerio</i>                                                                                                                                                                                |
| XP_001513606 | MR                    | <i>Ornithorhynchus anatinus</i>                                                                                                                                                                   |
| ABD46745     | MR                    | <i>Leucoraja erinacea</i>                                                                                                                                                                         |
| XP_420437    | MR                    | <i>Gallus gallus</i>                                                                                                                                                                              |
| 201600       | NR3C                  | <i>Branchiostoma floridae</i> ( <a href="http://genome.jgi-psf.org/cgi-bin/dispGeneModel?db=Brafl1&amp;tid=201600">http://genome.jgi-psf.org/cgi-bin/dispGeneModel?db=Brafl1&amp;tid=201600</a> ) |
| AAAY85275    | PR                    | <i>Danio rerio</i>                                                                                                                                                                                |
| AAA60081     | PR                    | <i>Homo sapiens</i>                                                                                                                                                                               |
| NP_990593    | PR                    | <i>Gallus gallus</i>                                                                                                                                                                              |
| NP_001079100 | PR                    | <i>Xenopus laevis</i>                                                                                                                                                                             |
| XP_001510439 | PR                    | <i>Ornithorhynchus anatinus</i>                                                                                                                                                                   |
| ABD46747     | PR                    | <i>Leucoraja erinacea</i>                                                                                                                                                                         |
| BAA89539     | PR                    | <i>Anguilla japonica</i>                                                                                                                                                                          |
| AAK20931     | progesterone-receptor | <i>Petromyzon marinus</i>                                                                                                                                                                         |
| CAA37496     | RXR                   | <i>Drosophila melanogaster</i>                                                                                                                                                                    |
| AAM46151     | RXR                   | <i>Branchiostoma floridae</i>                                                                                                                                                                     |
| CAA36982     | RXRa                  | <i>Homo sapiens</i>                                                                                                                                                                               |
| AAC59719     | RXRa1                 | <i>Danio rerio</i>                                                                                                                                                                                |
| AAA60293     | RXRb                  | <i>Homo sapiens</i>                                                                                                                                                                               |
| AAC59722     | RXRb1                 | <i>Danio rerio</i>                                                                                                                                                                                |
| AAA80681     | RXRg                  | <i>Homo sapiens</i>                                                                                                                                                                               |
| AAC59720     | RXRg1                 | <i>Danio rerio</i>                                                                                                                                                                                |
| ABD46743     | SR2                   | <i>Myxine glutinosa</i>                                                                                                                                                                           |
| AAQ98788     | AncSR1 (DBD)          | <i>Ancestral sequence of steroid receptors</i>                                                                                                                                                    |
| AAQ98789     | AncSR1 (LBD)          | <i>Ancestral sequence of steroid receptors</i>                                                                                                                                                    |
